# Supplementary material for: B/N-doped carbon nano-onions as nanocarriers for targeted breast cancer therapy
Source: Royal Society of Chemistry journal article supplement (doi:10.1039/d4nr04990j), 2025-01-01
Supplement: d4nr04990j1.zip [file d4nr04990j1.zip]

Supporting Information

# B/N-doped carbon nano-onions as nanocarriers for targeted breast cancer therapy

Hugh Mohan<sup>1</sup>, Iris Chiara Salaroglio<sup>2</sup>, Michał Bartkowski<sup>1</sup>, Kellyjean Courtney<sup>1</sup>, Ilaria Andreana<sup>3</sup>, Tania Limongi<sup>3</sup>, Raul Arenal<sup>4,5,6</sup>, Chiara Riganti<sup>2</sup>, Silvia Arpicco<sup>3\*</sup>, Silvia Giordani<sup>1\*</sup>

<sup>1</sup> School of Chemical Sciences, Lonsdale building, Dublin City University, Dublin, Ireland

<sup>2</sup> Department of Oncology and Molecular Biotechnology Center “G. Tarone”, piazza Nizza 44, 10126, Torino, Italy

<sup>3</sup> Department of Drug Science and Technology Via Pietro Giuria, 9, 10125, Torino, Italy

<sup>4</sup> Instituto de Nanociencia y Materiales de Aragon (INMA), CSIC-U. de Zaragoza, 50009, Zaragoza, Spain

<sup>5</sup> Laboratorio de Microscopias Avanzadas (LMA), Universidad de Zaragoza, 50018, Zaragoza, Spain

<sup>6</sup> ARAID Foundation, 50018, Zaragoza, Spain

\* Correspondence: [silvia.arpicco@unito.it](mailto:silvia.arpicco@unito.it)

\* Correspondence: [silvia.giordani@dcu.ie](mailto:silvia.giordani@dcu.ie)

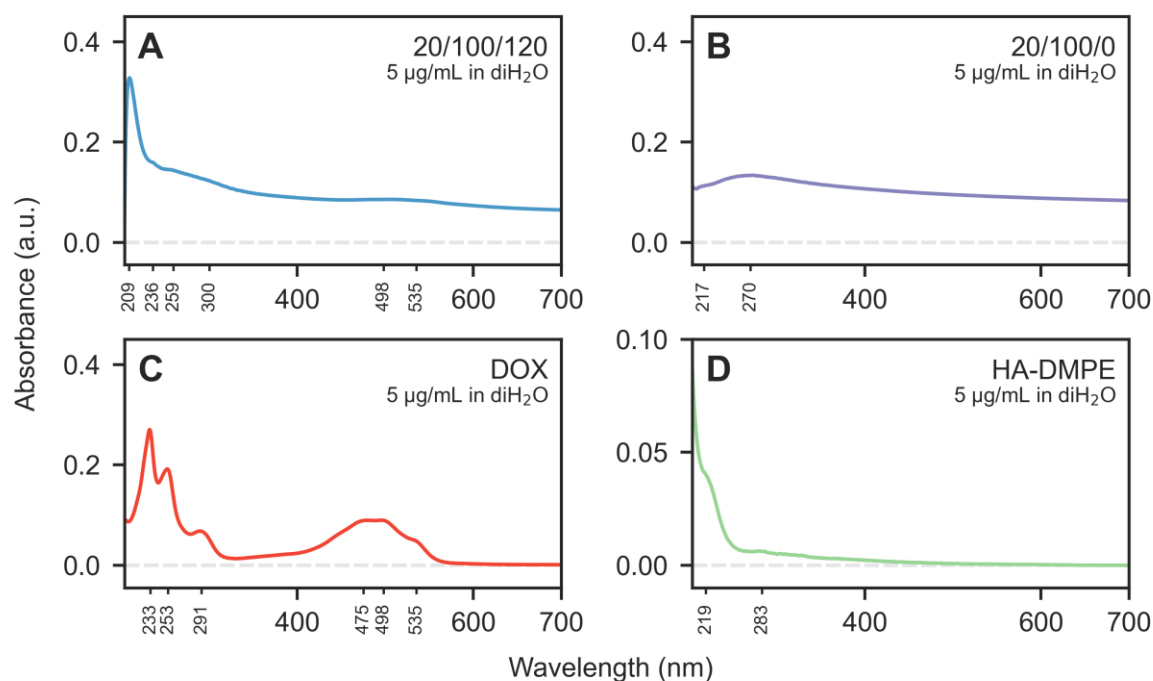

**Fig. S1** UV-vis absorption spectra of 5 µg/mL deionised water dispersions of (A) DOX-loaded 20/100/120, (B) DOX-free 20/100/0 wt% HA-DMPE/BN-CNO/DOX, (C) DOX, and (D) HA-DMPE

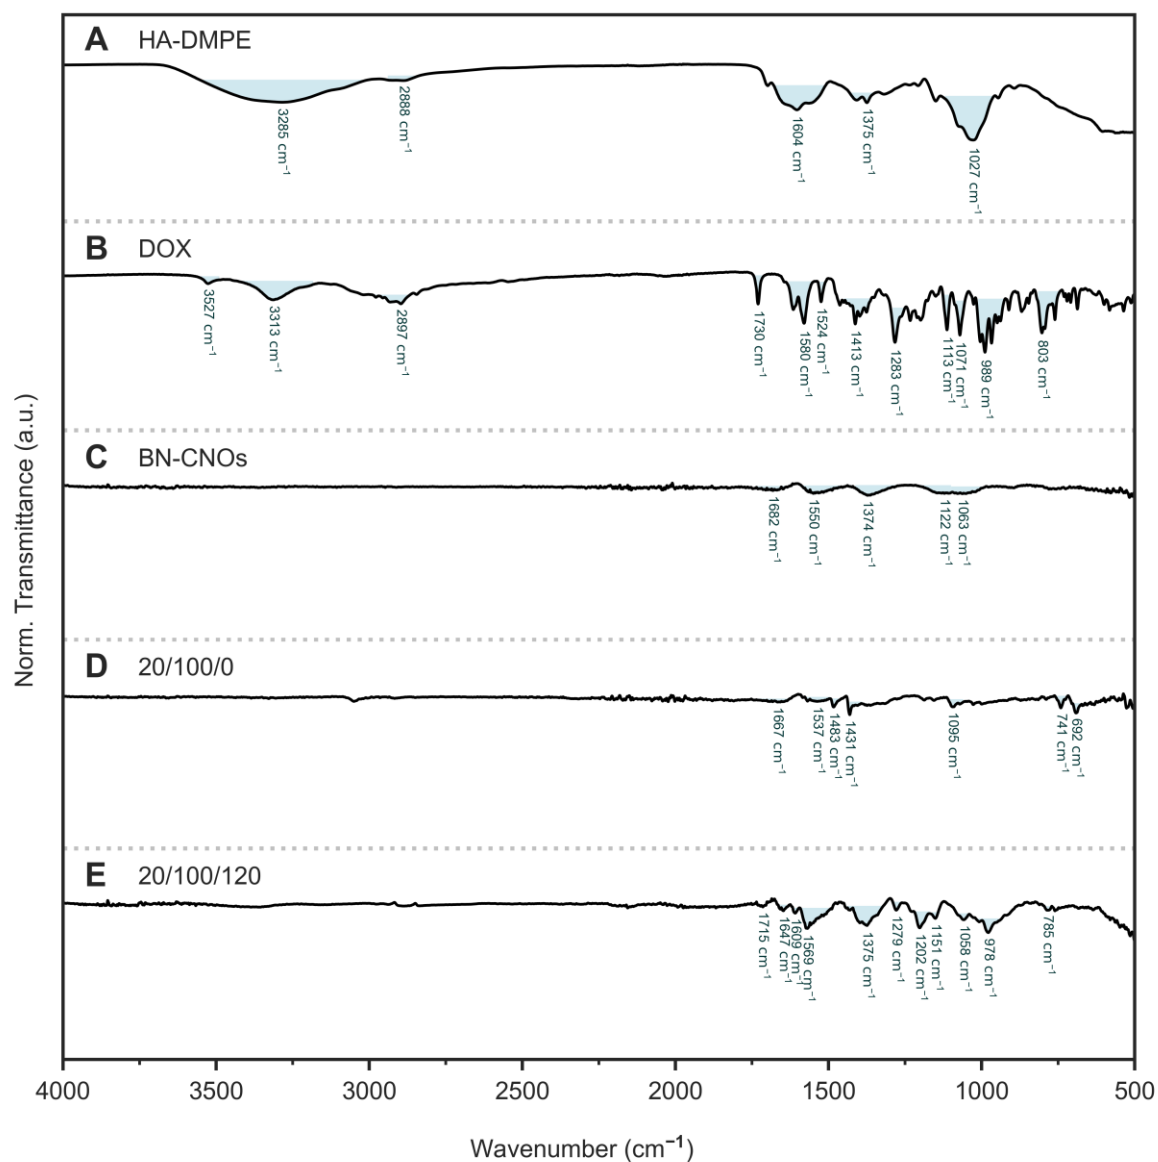

**Fig. S2** ATR-FTIR spectra of (A) HA-DMPE, (B) DOX, (C) BN-CNOs, (D) the DOX-free 20/100/0 and (E) the DOX-loaded 20/100/120 wt% HA-DMPE/BN-CNO/DOX nanocarrier.

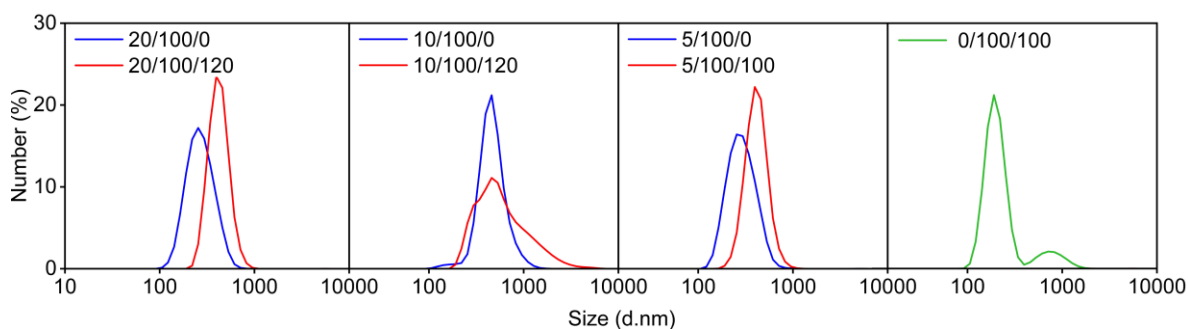

**Fig. S3** DLS number (%) distributions (5  $\mu\text{g/mL}$  in deionized water) of the DOX-free HA-DMPE-loaded 20/100/0, 10/100/0 and 5/100/0 wt% formulations (red), the DOX-loaded and HA-DMPE-loaded 20/100/120, 10/100/120, 5/100/100 wt% formulations (blue) and the DOX-loaded HA-DMPE-free 0/100/100 wt% formulation (green) of the HA-DMPE/BN-CNO/DOX nanocarrier.

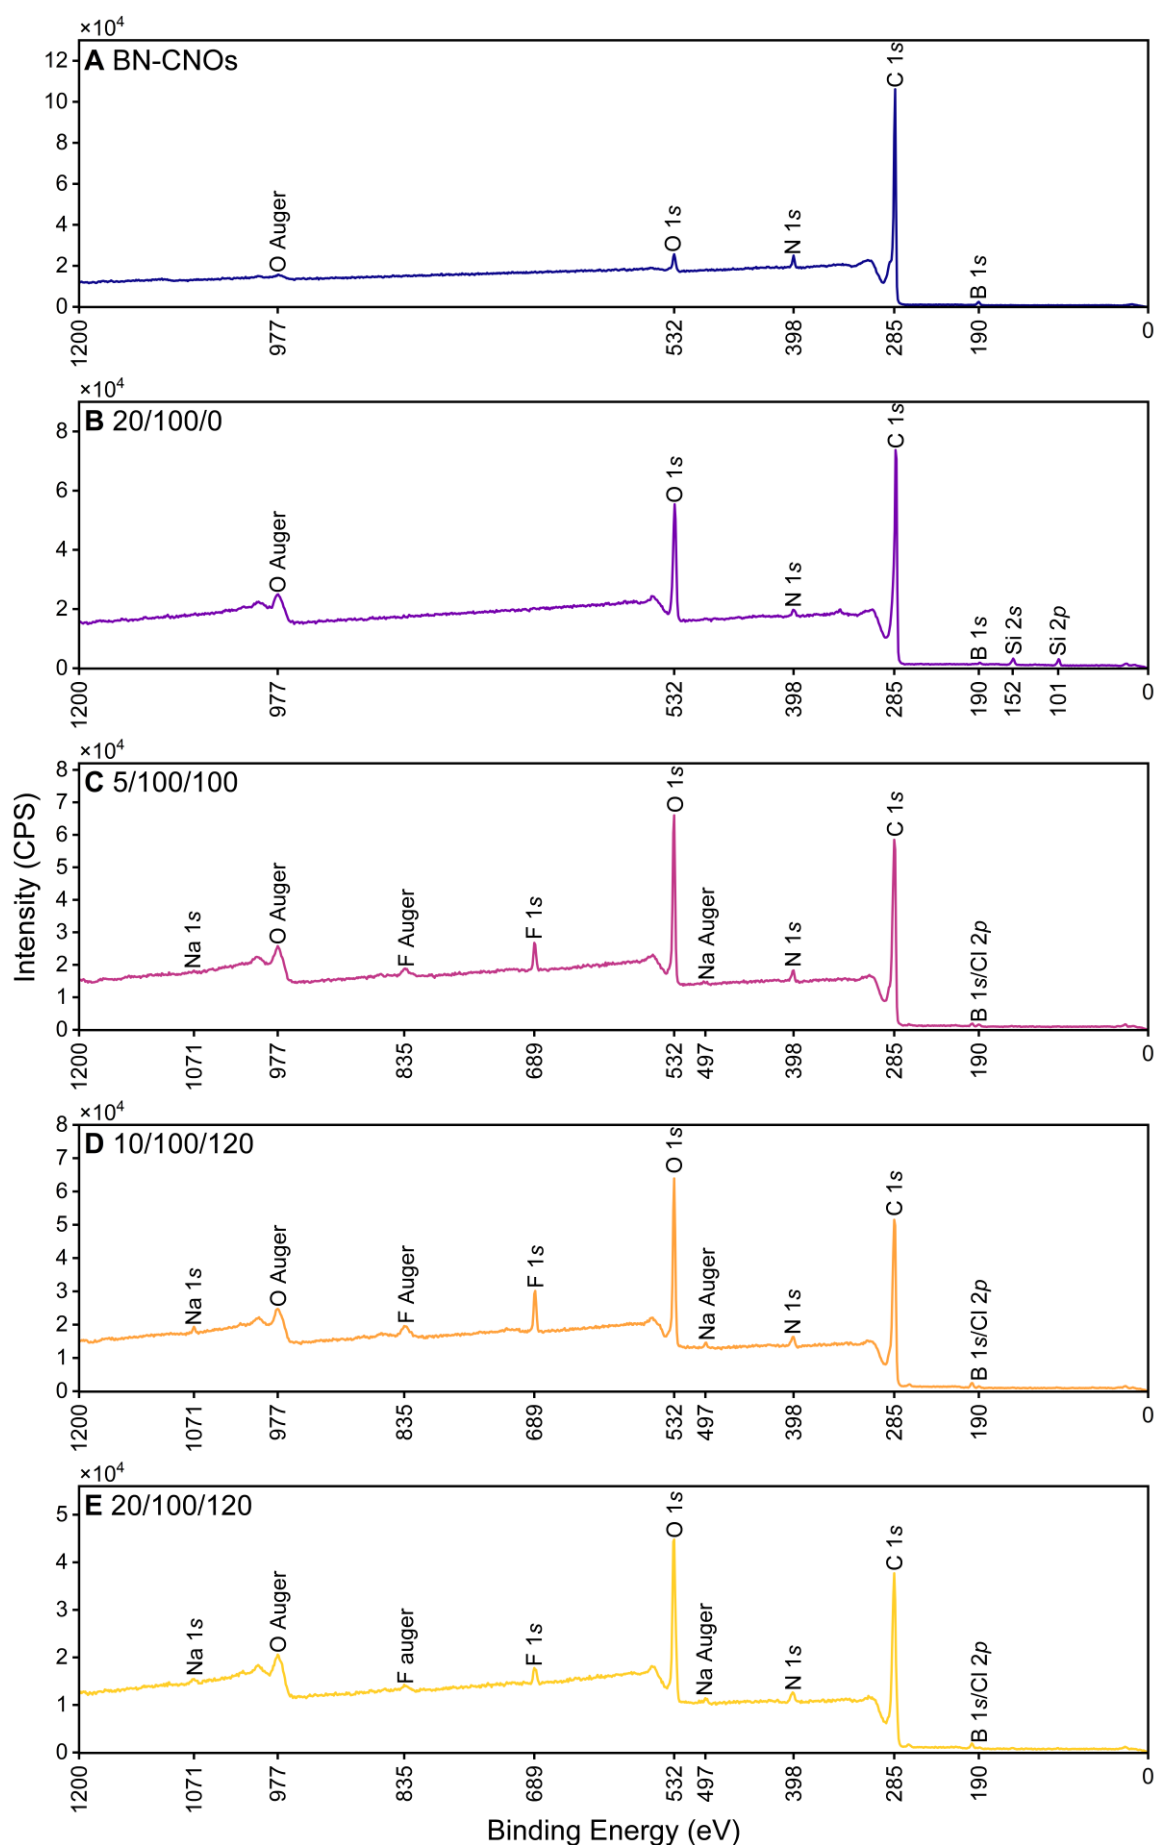

**Fig. S4** XPS survey spectra of (A) BN-CNOs and (B) 20/100/0, (C) 5/100/100, (D) 10/100/120, and (E) 20/100/120 wt% HA-DMPE/BN-CNO/DOX formulations

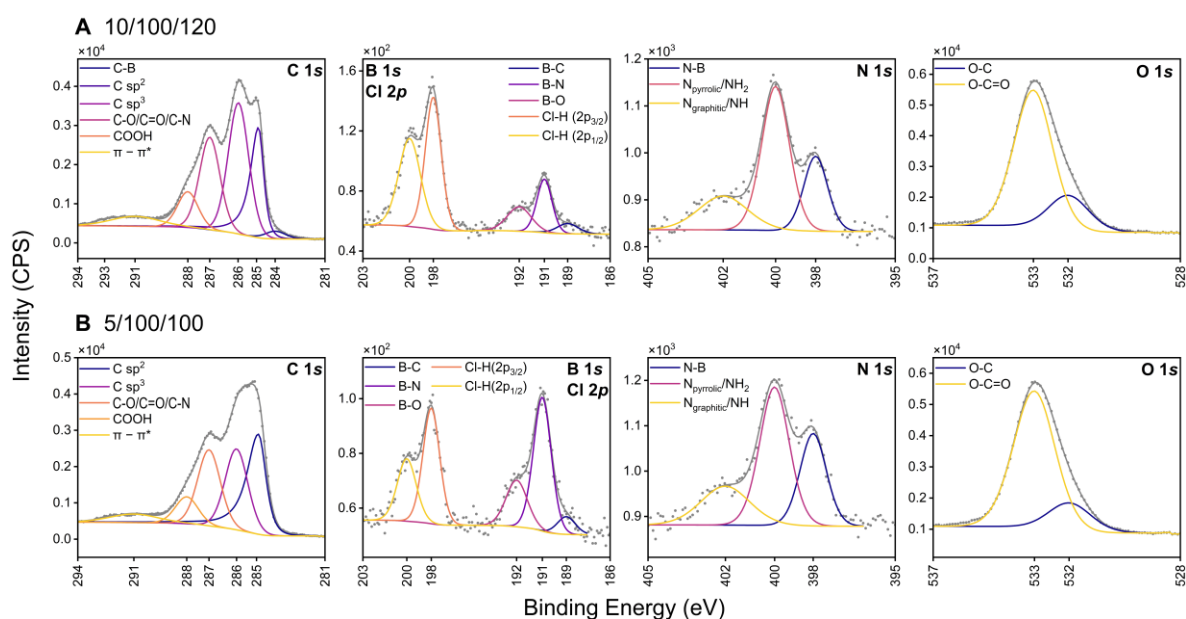

**Fig. S5** High-resolution core level XPS spectra of (A) 10/100/120 (top row; C 1s, B 1s, N 1s, and O 1s); (B) 5/100/100 wt% HA-DMPE/BN-CNO/DOX formulation (bottom row; C 1s, B 1s, N 1s, and O 1s). Spectra include experimental data (grey, scatter) and the fitted peak deconvolution envelope (grey, line).

**Table S1** XPS elemental composition in atomic percentage (at.%) of BN-CNOs, 20/100/0, 5/100/100, 10/100/120, and 20/100/120 wt% HA-DMPE/BN-CNO/DOX formulations.

|                   | C (at. %) | O (at. %) | N (at. %) | B (at. %) | Cl (at. %) |
|-------------------|-----------|-----------|-----------|-----------|------------|
| <b>BN-CNOs</b>    | 85.7      | 6.5       | 4.1       | 3.7       | -          |
| <b>20/100/0</b>   | 80.3      | 17.1      | 1.7       | 0.9       | -          |
| <b>5/100/100</b>  | 77.0      | 18.8      | 2.8       | 1.2       | 0.2        |
| <b>10/100/120</b> | 76.5      | 19.6      | 2.5       | 0.9       | 0.5        |
| <b>20/100/120</b> | 74.5      | 21.6      | 2.5       | 0.9       | 0.5        |

**Table S2** Position (eV), area (relative %), and chemical state of deconvoluted C 1s peaks obtained from high-resolution XPS analysis of BN-CNOs, 20/100/0, 5/100/100, 10/100/120, and 20/100/120 wt% HA-DMPE/BN-CNO/DOX formulations.

|                   | C charging        | C-B              | C sp <sup>2</sup> | C sp <sup>3</sup> | C-O/<br>C=O/C=N   | COOH             | π-π*             |
|-------------------|-------------------|------------------|-------------------|-------------------|-------------------|------------------|------------------|
| <b>BN-CNOs</b>    | -                 | -                | 284.5<br>(80.3 %) | 286.5<br>(6.3 %)  | 288.0<br>(2.6 %)  | 289.0<br>(1.6 %) | 291.0<br>(9.2 %) |
| <b>20/100/0</b>   | -                 | -                | 284.8<br>(32.2 %) | 285.3<br>(39.6 %) | 287.2<br>(16.8 %) | 288.8<br>(8.3 %) | 290.7<br>(3.1 %) |
| <b>5/100/100</b>  | -                 | -                | 284.5<br>(32.2 %) | 285.7<br>(25.9 %) | 287.1<br>(24.5 %) | 288.3<br>(9.9 %) | 291.1<br>(7.5 %) |
| <b>10/100/120</b> | -                 | 283.6<br>(2.0 %) | 284.5<br>(23.1 %) | 285.6<br>(34.5 %) | 287.1<br>(24.3 %) | 288.2<br>(9.4 %) | 291.0<br>(6.7 %) |
| <b>20/100/120</b> | 282.9<br>(11.7 %) | 284.0<br>(5.4 %) | 284.5<br>(14.3 %) | 285.6<br>(35.9 %) | 287.1<br>(22.1 %) | 288.4<br>(7.1 %) | 291.2<br>(3.5 %) |

**Table S3** Position (eV), area (relative %), and chemical state of deconvoluted B 1s and Cl 2p peaks obtained from high-resolution XPS analysis of BN-CNOs, 20/100/0, 5/100/100, 10/100/120, and 20/100/120 wt% HA-DMPE/BN-CNO/DOX formulations

|                   | B-B              | B-C               | B-N               | B-O               | Cl-Na             | Cl-H (2p <sub>3/2</sub> ) | Cl-H (2p <sub>1/2</sub> ) |
|-------------------|------------------|-------------------|-------------------|-------------------|-------------------|---------------------------|---------------------------|
| <b>BN-CNOs</b>    | -                | 189.5<br>(17.1 %) | 190.5<br>(34.1 %) | 191.8<br>(48.8 %) | -                 | -                         | -                         |
| <b>20/100/0</b>   | -                | -                 | 190.6<br>(82.7 %) | 192.6<br>(17.3 %) | -                 | -                         | -                         |
| <b>5/100/100</b>  | -                | 189.0<br>(8.7 %)  | 190.7<br>(64.5 %) | 192.4<br>(26.8 %) | -                 | 198.3<br>(62.3 %)         | 199.9<br>(37.7 %)         |
| <b>10/100/120</b> | -                | 188.9<br>(13.6 %) | 190.5<br>(50.1 %) | 192.3<br>(36.3 %) | -                 | 198.2<br>(53.4 %)         | 199.8<br>(46.6 %)         |
| <b>20/100/120</b> | 187.6<br>(2.5 %) | 189.1<br>(12.9 %) | 190.6<br>(51.2 %) | 192.3<br>(33.4 %) | 196.5<br>(20.1 %) | 198.3<br>(49.7 %)         | 199.9<br>(30.2 %)         |

**Table S4** Position (eV), area (relative %), and chemical state of deconvoluted N 1s and O 1s peaks obtained from high-resolution XPS analysis of BN-CNOs, 20/100/0, 5/100/100, 10/100/120, and 20/100/120 wt% HA-DMPE/BN-CNO/DOX formulations.

|                   | N-B               | N <sub>pyridinic</sub> | N <sub>pyrrolic</sub> /<br>NH <sub>2</sub> | N <sub>graphitic</sub> /<br>NH | O=C               | O-C               | O-C=O             |
|-------------------|-------------------|------------------------|--------------------------------------------|--------------------------------|-------------------|-------------------|-------------------|
| <b>BN-CNOs</b>    | 398.4<br>(30.7 %) | 398.9<br>(62.4 %)      | 400.4<br>(5.0 %)                           | 401.5<br>(1.9 %)               | -                 | 532.5<br>(100 %)  | -                 |
| <b>20/100/0</b>   | 398.4<br>(43.9 %) | -                      | -                                          | 400.6<br>(56.1 %)              | 530.9<br>(1.9 %)  | 532.3<br>(11.2 %) | 533.5<br>(86.9 %) |
| <b>5/100/100</b>  | 398.3<br>(28.9 %) | -                      | 399.9<br>(48.6 %)                          | 401.9<br>(22.5 %)              | -                 | 532.1<br>(18.2 %) | 533.3<br>(81.8 %) |
| <b>10/100/120</b> | 398.2<br>(24.0 %) | -                      | 399.8<br>(53.7 %)                          | 401.9<br>(22.3 %)              | -                 | 532.1<br>(21.6 %) | 533.4<br>(78.4 %) |
| <b>20/100/120</b> | 397.1<br>(7.6 %)  | 398.2<br>(18.1 %)      | 399.9<br>(54.5 %)                          | 402.3<br>(19.8 %)              | 530.8<br>(17.9 %) | 532.1<br>(19.6 %) | 533.4<br>(62.5 %) |

### Analysis of 20/100/0 wt% HA-DMPE/BN-CNO/DOX XPS spectra:

Attaching HA-DMPE to the BN-CNOs increases the O content to 17.1%, diluting the N and B contributions to 1.7% and 0.9% respectively, as seen in the survey spectrum (Fig. S4B) and elemental analysis (Tab. S1) of the DOX-free 20/100/0 wt% HA-DMPE/BN-CNO sample. The 10.6% increase in O can be attributed to the multiple oxygen-containing groups in the HA-DMPE, this serves to increase the solubility of the nanocarrier. The high-resolution core level C 1s spectrum of this 20/100/0 wt% material (Fig. 1B) reveals a large decrease in sp<sup>2</sup> C (32%), with sp<sup>3</sup> C increasing to 40% due to the HA-DMPE, which contains mostly sp<sup>3</sup> carbon. The  $\pi$ - $\pi^*$  contribution was also significantly diluted to 3% due to the lack of delocalised electrons in the polymer. The amount of carbon bound to O/N increased to 25%

due to the HA-DMPE. The B 1s spectrum of HA-DMPE functionalised BN-CNOs shows the boron is split between B-N (83%) and B-O (17%). A 54% increase in the N-graphitic/NH contribution to the N 1s spectrum is noted upon polymer functionalisation, resulting from the primary amine groups in the conjugate polymer. The N-B contribution increased by over 10% to 43%. The additional O containing groups from the HA-DMPE resulted in a more complex O 1s spectrum, with 2%, 11%, and 87% contributions arising from O=C, O-C, and O-C=O groups, all of which are present in the HA-DMPE polymer and contribute to the negative ZP and enhanced water solubility of the HA-DMPE/BN-CNOs.

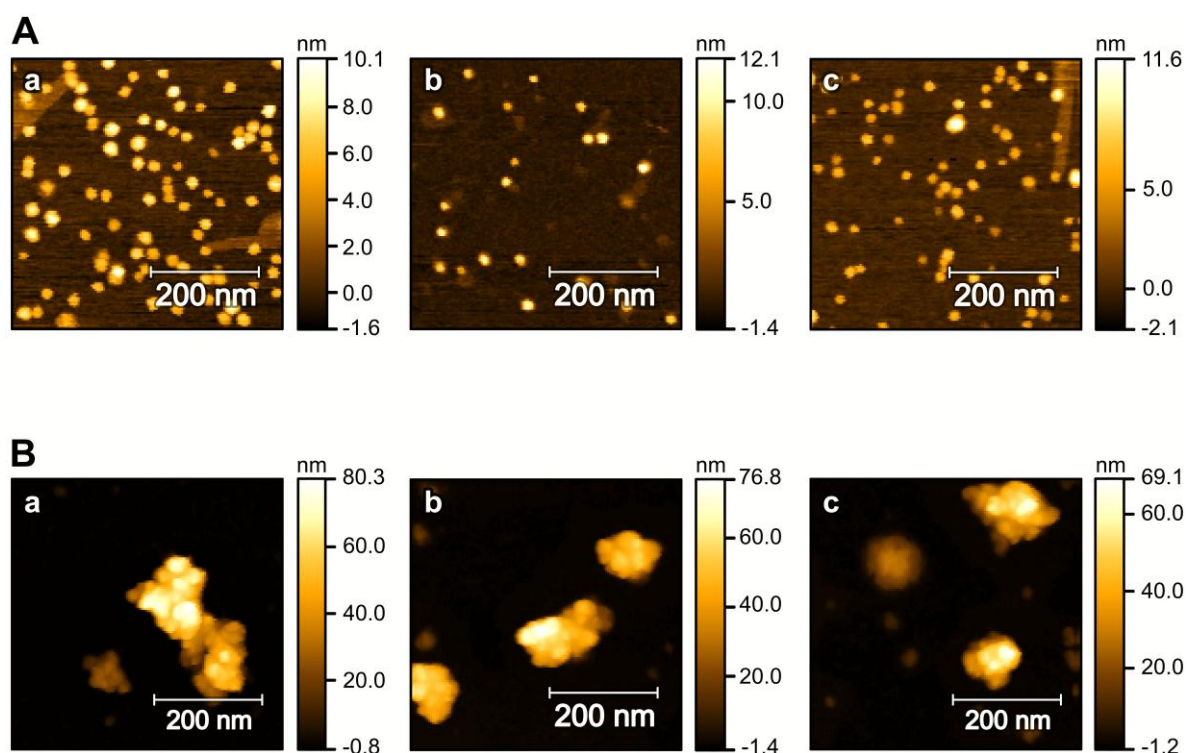

**Fig. S6** AFM micrographs of (A) BN-CNOs, and (B) the 20/100/120 wt% HA-DMPE/BN-CNO/DOX formulation. All micrographs represent different  $0.5 \times 0.5 \mu\text{m}$  regions of the batch material (scalebars = 200 nm).

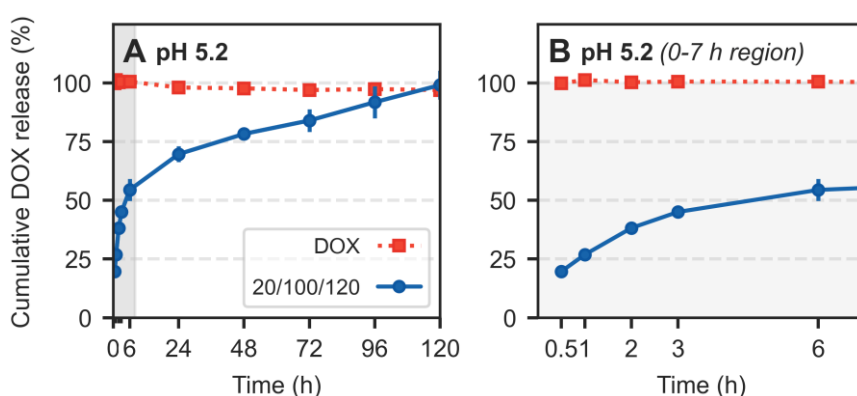

**Fig. S7** (A) Extended cumulative DOX release profile up to 120 h for the 20/100/120 wt% HA-DMPE/BN-CNO/DOX formulation in 0.01 M sodium acetate buffer (pH 5.2). The region marked in grey has been zoomed in and presented in (B). DOX is shown as a control.

**Table S5** Percentage cumulative DOX release and standard deviations from the triplicate drug release analysis of the HA-DMPE/BN-CNO/DOX nanocarrier formulations with varying HA-DMPE and DOX content (20/100/120, 10/100/120, 5/100/100, and 0/100/100 wt%) in 0.01 M sodium acetate buffer (pH 5.2) and 0.01 M PBS buffer (pH 7.4) at all measured time points up to 72 h. The extended-release studies up to 120 h for the 20/100/120 wt% formulation in pH 5.2 buffer are also shown.

| Time (h) | 20/100/120<br>DOX release (% $\pm$ $\sigma$ ) |                | 10/100/120<br>DOX release (% $\pm$ $\sigma$ ) |                | 5/100/100<br>DOX release (% $\pm$ $\sigma$ ) |                | 0/100/100<br>DOX release (% $\pm$ $\sigma$ ) |                |
|----------|-----------------------------------------------|----------------|-----------------------------------------------|----------------|----------------------------------------------|----------------|----------------------------------------------|----------------|
|          | pH 7.4                                        | pH 5.2         | pH 7.4                                        | pH 5.2         | pH 7.4                                       | pH 5.2         | pH 7.4                                       | pH 5.2         |
| 0.5      | 3.2 $\pm$ 0.2                                 | 19.7 $\pm$ 1.3 | 3.8 $\pm$ 1.0                                 | 17.0 $\pm$ 1.8 | 1.7 $\pm$ 0.3                                | 9.7 $\pm$ 3.1  | 1.5 $\pm$ 0.5                                | 3.3 $\pm$ 1.2  |
| 1        | 3.7 $\pm$ 0.4                                 | 26.8 $\pm$ 1.2 | 4.2 $\pm$ 0.2                                 | 17.4 $\pm$ 0.4 | 2.1 $\pm$ 0.8                                | 15.7 $\pm$ 6.4 | 2.1 $\pm$ 0.2                                | 3.3 $\pm$ 0.6  |
| 2        | 4.5 $\pm$ 0.3                                 | 38.2 $\pm$ 2.1 | 5.2 $\pm$ 0.1                                 | 22.8 $\pm$ 2.7 | 2.1 $\pm$ 0.7                                | 21.3 $\pm$ 3.1 | 2.4 $\pm$ 0.5                                | 5.3 $\pm$ 0.6  |
| 3        | 4.8 $\pm$ 0.3                                 | 45.1 $\pm$ 0.8 | 5.5 $\pm$ 0.2                                 | 24.2 $\pm$ 2.9 | 2.5 $\pm$ 0.5                                | 25.7 $\pm$ 5.7 | 2.9 $\pm$ 0.1                                | 5.3 $\pm$ 0.6  |
| 6        | 4.7 $\pm$ 0.6                                 | 54.4 $\pm$ 4.7 | 6.0 $\pm$ 0.2                                 | 27.5 $\pm$ 5.0 | 3.7 $\pm$ 1.2                                | 31.7 $\pm$ 3.1 | 3.9 $\pm$ 0.1                                | 6.0 $\pm$ 1.0  |
| 24       | 5.0 $\pm$ 0.3                                 | 69.7 $\pm$ 3.4 | 5.8 $\pm$ 0.4                                 | 33.4 $\pm$ 1.4 | 3.3 $\pm$ 0.6                                | 36.3 $\pm$ 7.2 | 3.6 $\pm$ 0.5                                | 13.0 $\pm$ 1.1 |
| 48       | 5.7 $\pm$ 0.3                                 | 78.3 $\pm$ 2.8 | 6.6 $\pm$ 0.0                                 | 34.3 $\pm$ 1.0 | 3.9 $\pm$ 0.9                                | 41.7 $\pm$ 6.8 | 5.0 $\pm$ 0.0                                | 13.0 $\pm$ 1.1 |
| 72       | 6.9 $\pm$ 0.6                                 | 84.0 $\pm$ 4.8 | 7.8 $\pm$ 0.3                                 | 37.5 $\pm$ 1.7 | 4.8 $\pm$ 1.0                                | 46.7 $\pm$ 8.4 | 5.5 $\pm$ 0.5                                | 14.0 $\pm$ 0.8 |
| 96       | -                                             | 91.8 $\pm$ 6.8 | -                                             | -              | -                                            | -              | -                                            | -              |
| 120      | -                                             | 99.1 $\pm$ 6.2 | -                                             | -              | -                                            | -              | -                                            | -              |

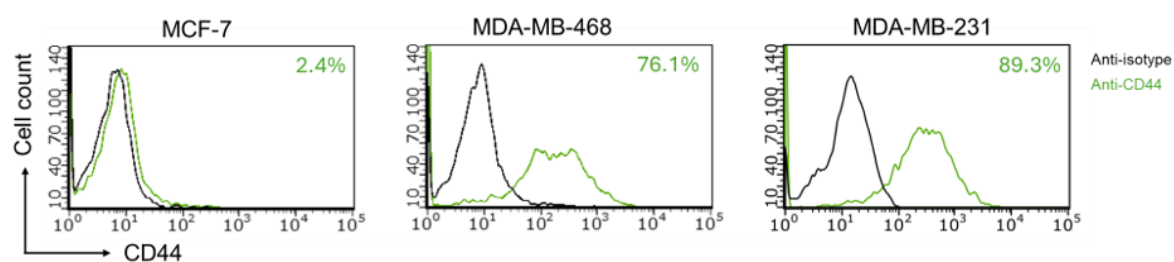

**Fig. S8** Flow cytometry results of CD44 receptor expression in MCF-7, MDA-MB-468, and MDA-MB-231 cell lines (% positive cells)

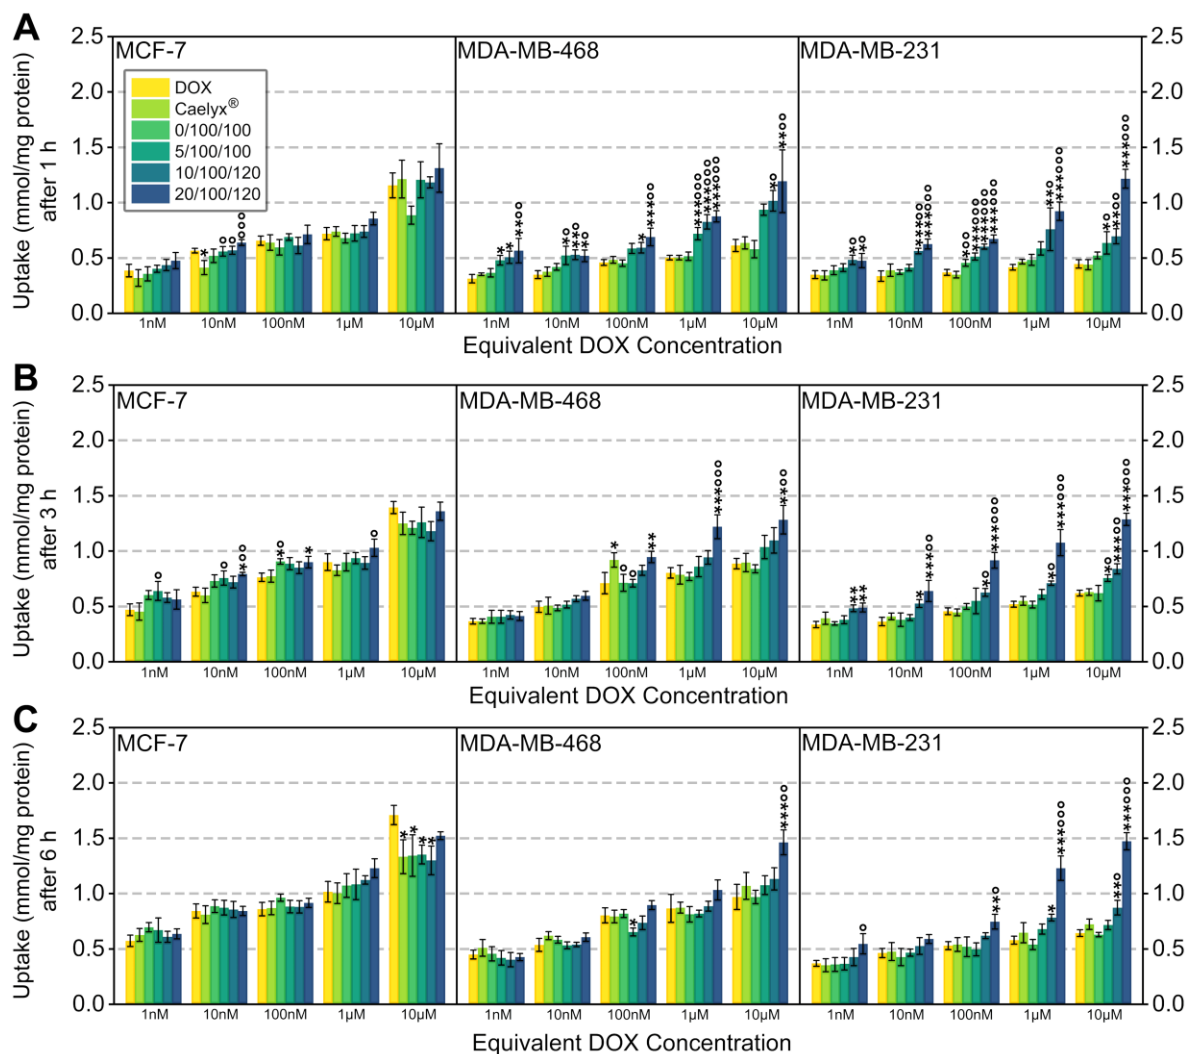

**Fig. S9** 1 h (A), 3 h (B), and 6 h (C) uptake of DOX, Caelyx®, and various HA-DMPE/BN-CNO/DOX formulations in MCF-7, MDA-MB-468, and MDA-MB-231 cells. Statistical significance is indicated as \* $p < 0.05$ , \*\* $p < 0.01$ , \*\*\* $p < 0.001$  vs. DOX, and ° $p < 0.05$ , °° $p < 0.01$ , °°° $p < 0.001$  vs. Caelyx®.

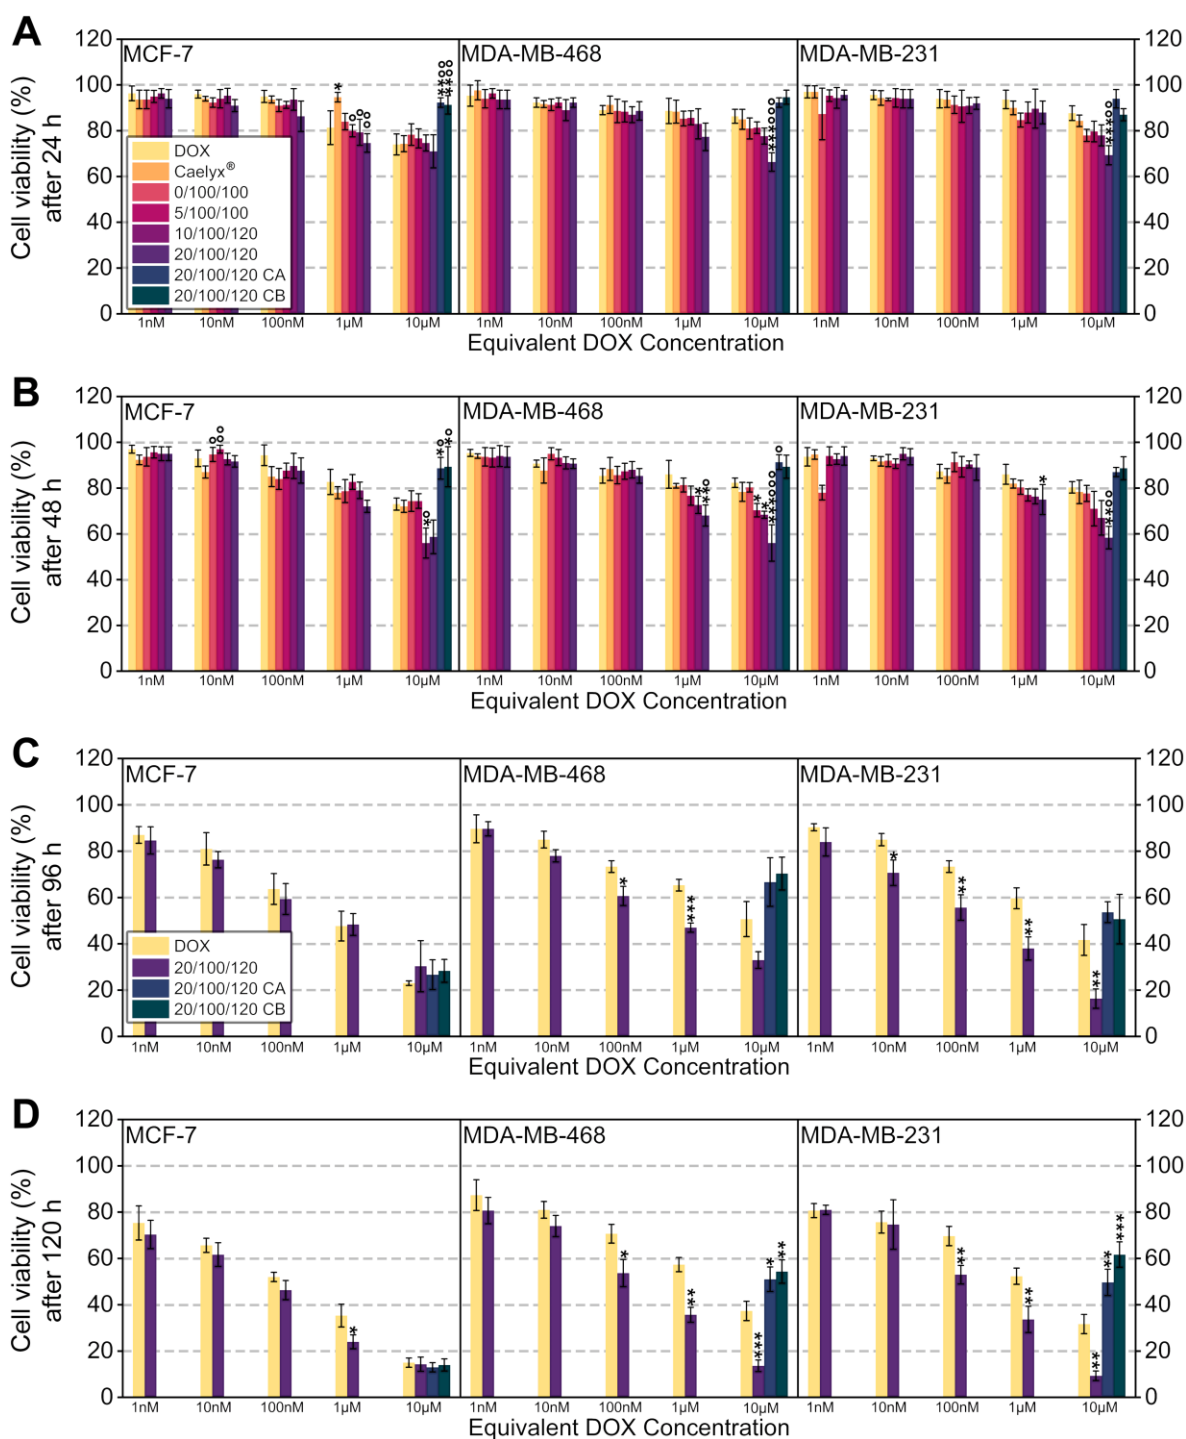

**Fig. S10** 24 h (A) and 48 h (B) MCF-7, MDA-MB-468, and MDA-MB-231 cell viability treated with various concentrations of DOX, Caelyx®, and different HA-DMPE/BN-CNO/DOX formulations; (C) and (D) represent the extended studies carried out at 96 and 120 h for the 20/100/120 wt% HA-DMPE/BN-CNO/DOX formulation. Statistical significance is indicated as \* $p < 0.05$ , \*\* $p < 0.01$ , \*\*\* $p < 0.001$  vs. DOX, and ° $p < 0.05$ , °° $p < 0.01$ , °°° $p < 0.001$  vs. Caelyx®. Competitive co-incubations with excess HA or anti-CD44 blocking antibodies are labelled as CA and CB, respectively.

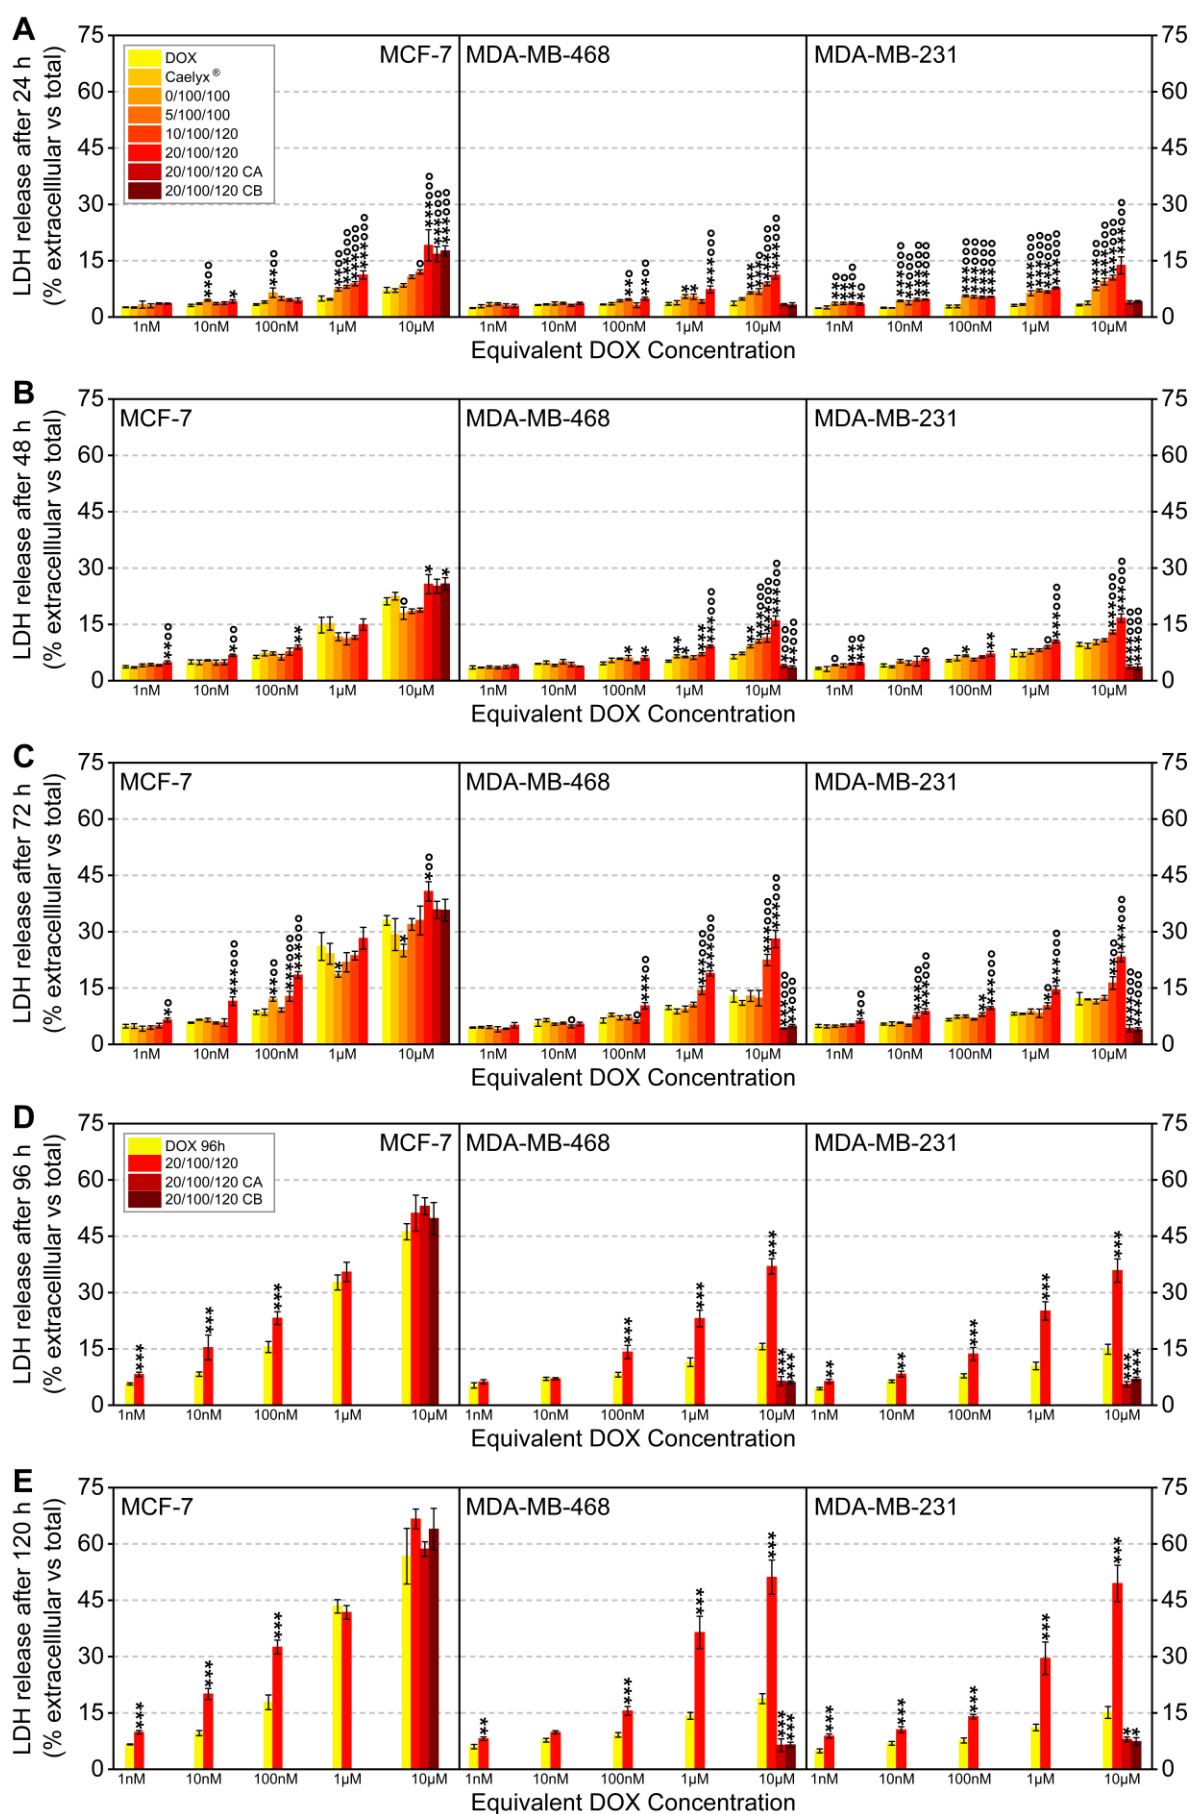

**Fig. S11** 24 h (A), 48 h (B), and 72 h (C) MCF-7, MDA-MB-468, and MDA-MB-231 extracellular LDH treated with various concentrations of DOX, Caelyx®, and different HA-DMPE/BN-CNO/DOX formulations; (D) and (E) represent the extended studies carried out at 96 and 120 h for the 20/100/120 wt% HA-DMPE/BN-CNO/DOX formulation. Statistical significance is indicated as \* $p < 0.05$ , \*\* $p < 0.01$ , \*\*\* $p < 0.001$  vs. DOX, and ° $p < 0.05$ , °° $p < 0.01$ , °°° $p < 0.001$  vs. Caelyx®. Competitive co-incubations with excess HA or anti-CD44 blocking antibodies are labelled as CA and CB, respectively.

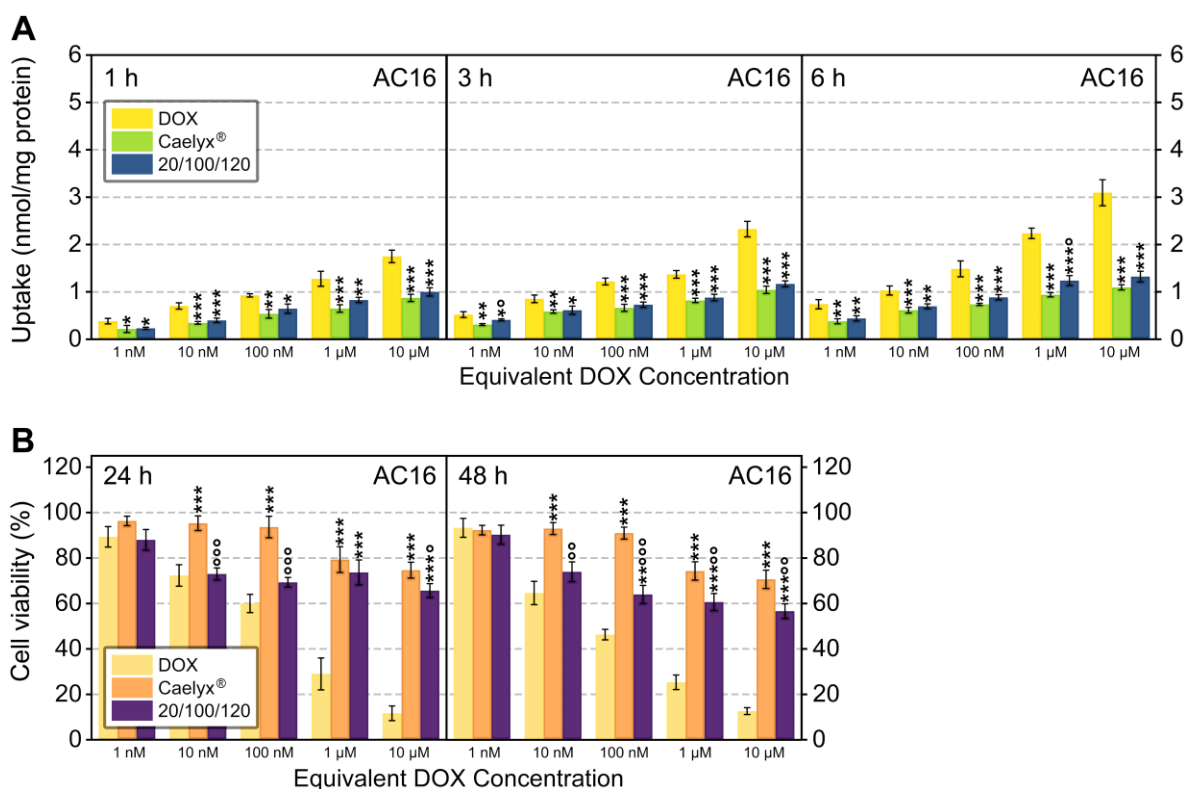

**Fig. S12** AC16 1, 3, and 6 h cell uptake (A) and 24, and 48 h cell viability (B) with varying concentrations of DOX, Caelyx®, and 20/100/120 wt% HA-DMPE/BN-CNO/DOX. Statistical significance is indicated as \* $p < 0.05$ , \*\* $p < 0.01$ , \*\*\* $p < 0.001$  vs. DOX, and ° $p < 0.05$ , °° $p < 0.01$ , °°° $p < 0.001$  vs. Caelyx®.

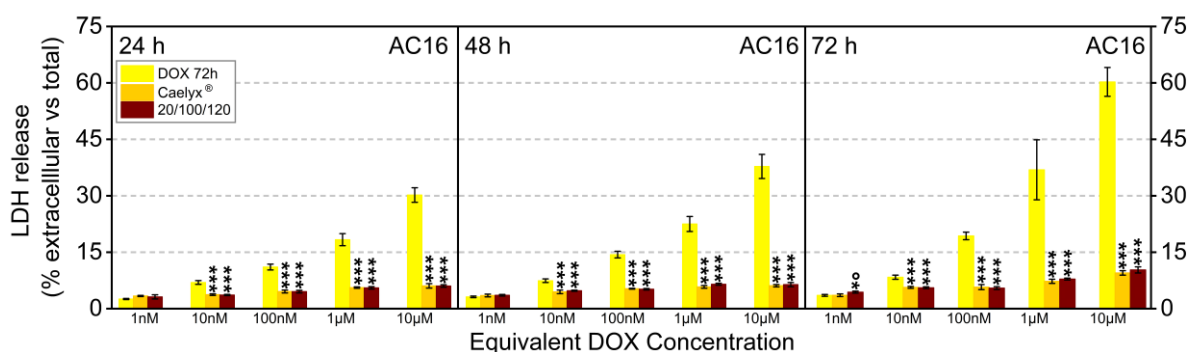

**Fig. S13** Extracellular LDH, measured at 24 h (A), 48 h (B), and 72 h (C) measured in AC16 cells with varying concentrations of DOX, Caelyx®, and 20/100/120 wt% HA-DMPE/BN-CNO/DOX. Statistical significance is indicated as \* $p < 0.05$ , \*\* $p < 0.01$ , \*\*\* $p < 0.001$  vs. DOX, and ° $p < 0.05$ , °° $p < 0.01$ , °°° $p < 0.001$  vs. Caelyx®.
